# Supplementary material for: Phenotypic Characterization Analysis of Human Hepatocarcinoma by Urine Metabolomics Approach
Source: PubMed Central journal article supplement (PMC4726192; doi:10.1038/srep19763), 2016-01-25
Supplement: srep19763-s1.pdf [file srep19763-s1.pdf]

# Phenotypic Characterization Analysis of Human Hepatocarcinoma by Urine Metabolomics Approach

Qun Liang<sup>1\*</sup>, Han Liu<sup>2</sup>, Cong Wang<sup>1</sup>, Binbing Li<sup>1</sup>

*1. First Affiliated Hospital, Heilongjiang University of Chinese Medicine, Heping Road 24, Xiangfang District, Harbin 150040, China*

*2. Simon Fraser University (SFU), Burnaby, British Columbia, Canada.*

Correspondence

Prof. Qun Liang

First Affiliated Hospital

Heilongjiang University of Chinese Medicine

Heping Road 24,

Xiangfang District,

Harbin 150040, China

Tel. & Fax +86-451-86053141

Email: qunliang1970@126.com

**Table 1.** Clinical characteristics of the subjects at baseline.

| Samples                 | HCC          | Control     |
|-------------------------|--------------|-------------|
| Sample No.              | 25           | 12          |
| Age                     | 38±4         | 40±3        |
| Sex (F/M)               | 12/13        | 6/6         |
| BMI(kg/m <sup>2</sup> ) | 21.77±2.56   | 22.25±1.91  |
| ALT (U/L)               | 110.46±49.35 | 56.78±27.13 |
| AST (U/L)               | 90.10±52.45  | 37.07±26.92 |
| GGT(U/L)                | 76.18±17.72  | 34.27±9.34  |
| Median tumor size (cm)  | <2 cm        | -           |
| AFP(ng/mL)              | 109.22±3.76  | 1.64±0.89   |

**Table 2.** Primary metabolites differentially expressed in urine of HCC and normal control patients.

| No. | VIP     | Rt   | [M+H] <sup>+</sup> | [M-H] <sup>-</sup> | Formula                                                       | Metabolites                      | HMDB      | PubChem |
|-----|---------|------|--------------------|--------------------|---------------------------------------------------------------|----------------------------------|-----------|---------|
| 1   | 10.3182 | 4.64 | 257.0823           |                    | C <sub>16</sub> H <sub>34</sub> O <sub>2</sub>                | Palmitic acid                    | HMDB00220 | 985     |
| 2   | 9.55195 | 3.84 | 265.1887           |                    | C <sub>13</sub> H <sub>16</sub> N <sub>2</sub> O <sub>4</sub> | Alpha-N-Phenylacetyl-L-glutamine | HMDB06344 | 92258   |
| 3   | 7.5964  | 5.22 | 318.2927           |                    | C <sub>18</sub> H <sub>40</sub> NO <sub>3</sub>               | Phytosphingosine                 | HMDB04610 | 122121  |
| 4   | 7.18613 | 3.81 | 304.1372           |                    | C <sub>15</sub> H <sub>19</sub> N <sub>3</sub> O <sub>4</sub> | Indoleacetyl glutamine           | NA        | NA      |
| 5   | 6.88439 | 8.46 | 466.3082           |                    | C <sub>26</sub> H <sub>44</sub> NO <sub>6</sub>               | Glycocholic acid                 | HMDB00138 | 439604  |
| 6   | 6.68089 | 3.83 | 179.0514           |                    | C <sub>9</sub> H <sub>9</sub> NO <sub>3</sub>                 | Hippurate                        | HMDB00714 | 464     |
| 7   | 6.51659 | 4.29 | 220.9994           |                    | C <sub>11</sub> H <sub>14</sub> N <sub>2</sub> O <sub>3</sub> | 5-Hydroxy-L-tryptophan           | HMDB00472 | 144     |
| 8   | 6.33054 | 2.61 | 144.0076           |                    | C <sub>5</sub> H <sub>5</sub> O <sub>5</sub>                  | 2-Oxopentanedioate               | HMDB00208 | 51      |
| 9   | 6.25576 | 4.53 | 516.2921           |                    | C <sub>26</sub> H <sub>46</sub> NO <sub>7</sub> S             | Taurocholic acid                 | HMDB00036 | 440567  |
| 10  | 6.07649 | 4.43 | 393.2948           |                    | C <sub>24</sub> H <sub>41</sub> O <sub>4</sub>                | Chenodeoxycholic acid            | HMDB00518 | 10133   |
| 11  | 8.5538  | 6.5  |                    | 539.2488           | C <sub>27</sub> H <sub>40</sub> O <sub>11</sub>               | Cortolone-3-glucuronide          | HMDB10320 | 125853  |
| 12  | 7.1982  | 7.19 |                    | 285.0062           | C <sub>19</sub> H <sub>24</sub> O <sub>2</sub>                | Androstenedione                  | HMDB00053 | 6128    |
| 13  | 6.4612  | 5.24 |                    | 252.1392           | C <sub>13</sub> H <sub>17</sub> NO <sub>4</sub>               | 3-Indolecarboxylic acid          | HMDB03320 | 69867   |
| 14  | 6.1047  | 6.66 |                    | 541.2601           | C <sub>27</sub> H <sub>42</sub> O <sub>11</sub>               | Cortolone-3-glucuronide          | HMDB10320 | 125853  |
| 15  | 6.0566  | 2.44 |                    | 195.0496           | C <sub>10</sub> H <sub>12</sub> O <sub>4</sub>                | Homoveratric acid                | HMDB00434 | 7139    |

**Table 3:** Pathway-associated metabolite sets for HCC from Metabolite Set Enrichment Analysis.

| No. |                                       | Total | Expected | Hits | Raw p | p-value |
|-----|---------------------------------------|-------|----------|------|-------|---------|
| 1   | Bile acid biosynthesis                | 49    | 0.772    | 3    | 0.037 | 0.00    |
| 2   | Citric acid cycle                     | 23    | 0.362    | 1    | 0.309 | 0.01    |
| 3   | Tryptophan metabolism                 | 34    | 0.536    | 1    | 0.424 | 0.02    |
| 4   | Urea cycle                            | 20    | 0.315    | 1    | 0.275 | 0.04    |
| 5   | Phenylacetate metabolism              | 4     | 0.063    | 1    | 0.062 | 0.06    |
| 6   | Alanine metabolism                    | 6     | 0.095    | 1    | 0.091 | 0.06    |
| 7   | Malate-aspartate shuttle              | 8     | 0.126    | 1    | 0.120 | 0.09    |
| 8   | Glucose-alanine cycle                 | 12    | 0.189    | 1    | 0.175 | 0.12    |
| 9   | Glycerolipid metabolism               | 13    | 0.205    | 1    | 0.188 | 0.12    |
| 10  | Androgen and estrogen metabolism      | 17    | 0.268    | 1    | 0.239 | 0.17    |
| 11  | Ammonia recycling                     | 18    | 0.284    | 1    | 0.251 | 0.19    |
| 12  | Glutamate metabolism                  | 18    | 0.284    | 1    | 0.251 | 0.22    |
| 13  | Insulin signalling                    | 19    | 0.299    | 1    | 0.263 | 0.28    |
| 14  | Fatty acid elongation in mitochondria | 26    | 0.410    | 1    | 0.343 | 0.38    |
| 15  | Gluconeogenesis                       | 27    | 0.425    | 1    | 0.353 | 0.47    |
| 16  | Fatty acid metabolism                 | 29    | 0.457    | 1    | 0.374 | 0.47    |

**Table 4:** Location-based metabolite sets for HCC from Metabolite Set Enrichment Analysis.

| No. |                       | Total | Expected | Hits | Raw p | p-value |
|-----|-----------------------|-------|----------|------|-------|---------|
| 1   | Liver                 | 234   | 4.06     | 4    | 0.618 | 0.01    |
| 2   | Hepatocyte            | 1     | 0.02     | 1    | 0.017 | 0.03    |
| 3   | Fibroblasts           | 183   | 3.17     | 4    | 0.395 | 0.03    |
| 4   | Kidney                | 164   | 2.84     | 2    | 0.815 | 0.05    |
| 5   | Platelet              | 108   | 1.87     | 2    | 0.580 | 0.12    |
| 6   | Epidermis             | 100   | 1.73     | 2    | 0.535 | 0.13    |
| 7   | Thyroid gland         | 12    | 0.21     | 1    | 0.191 | 0.14    |
| 8   | Myelin                | 26    | 0.45     | 1    | 0.370 | 0.22    |
| 9   | Skeletal muscle       | 45    | 0.78     | 1    | 0.556 | 0.33    |
| 10  | Membrane              | 50    | 0.87     | 1    | 0.595 | 0.37    |
| 11  | Endoplasmic reticulum | 53    | 0.92     | 1    | 0.617 | 0.42    |
| 12  | Bladder               | 92    | 1.59     | 1    | 0.820 | 0.48    |
| 13  | Muscle                | 101   | 1.75     | 1    | 0.850 | 0.60    |
| 14  | Brain                 | 122   | 2.11     | 1    | 0.903 | 0.62    |
| 15  | Intestine             | 145   | 2.51     | 1    | 0.940 | 0.78    |

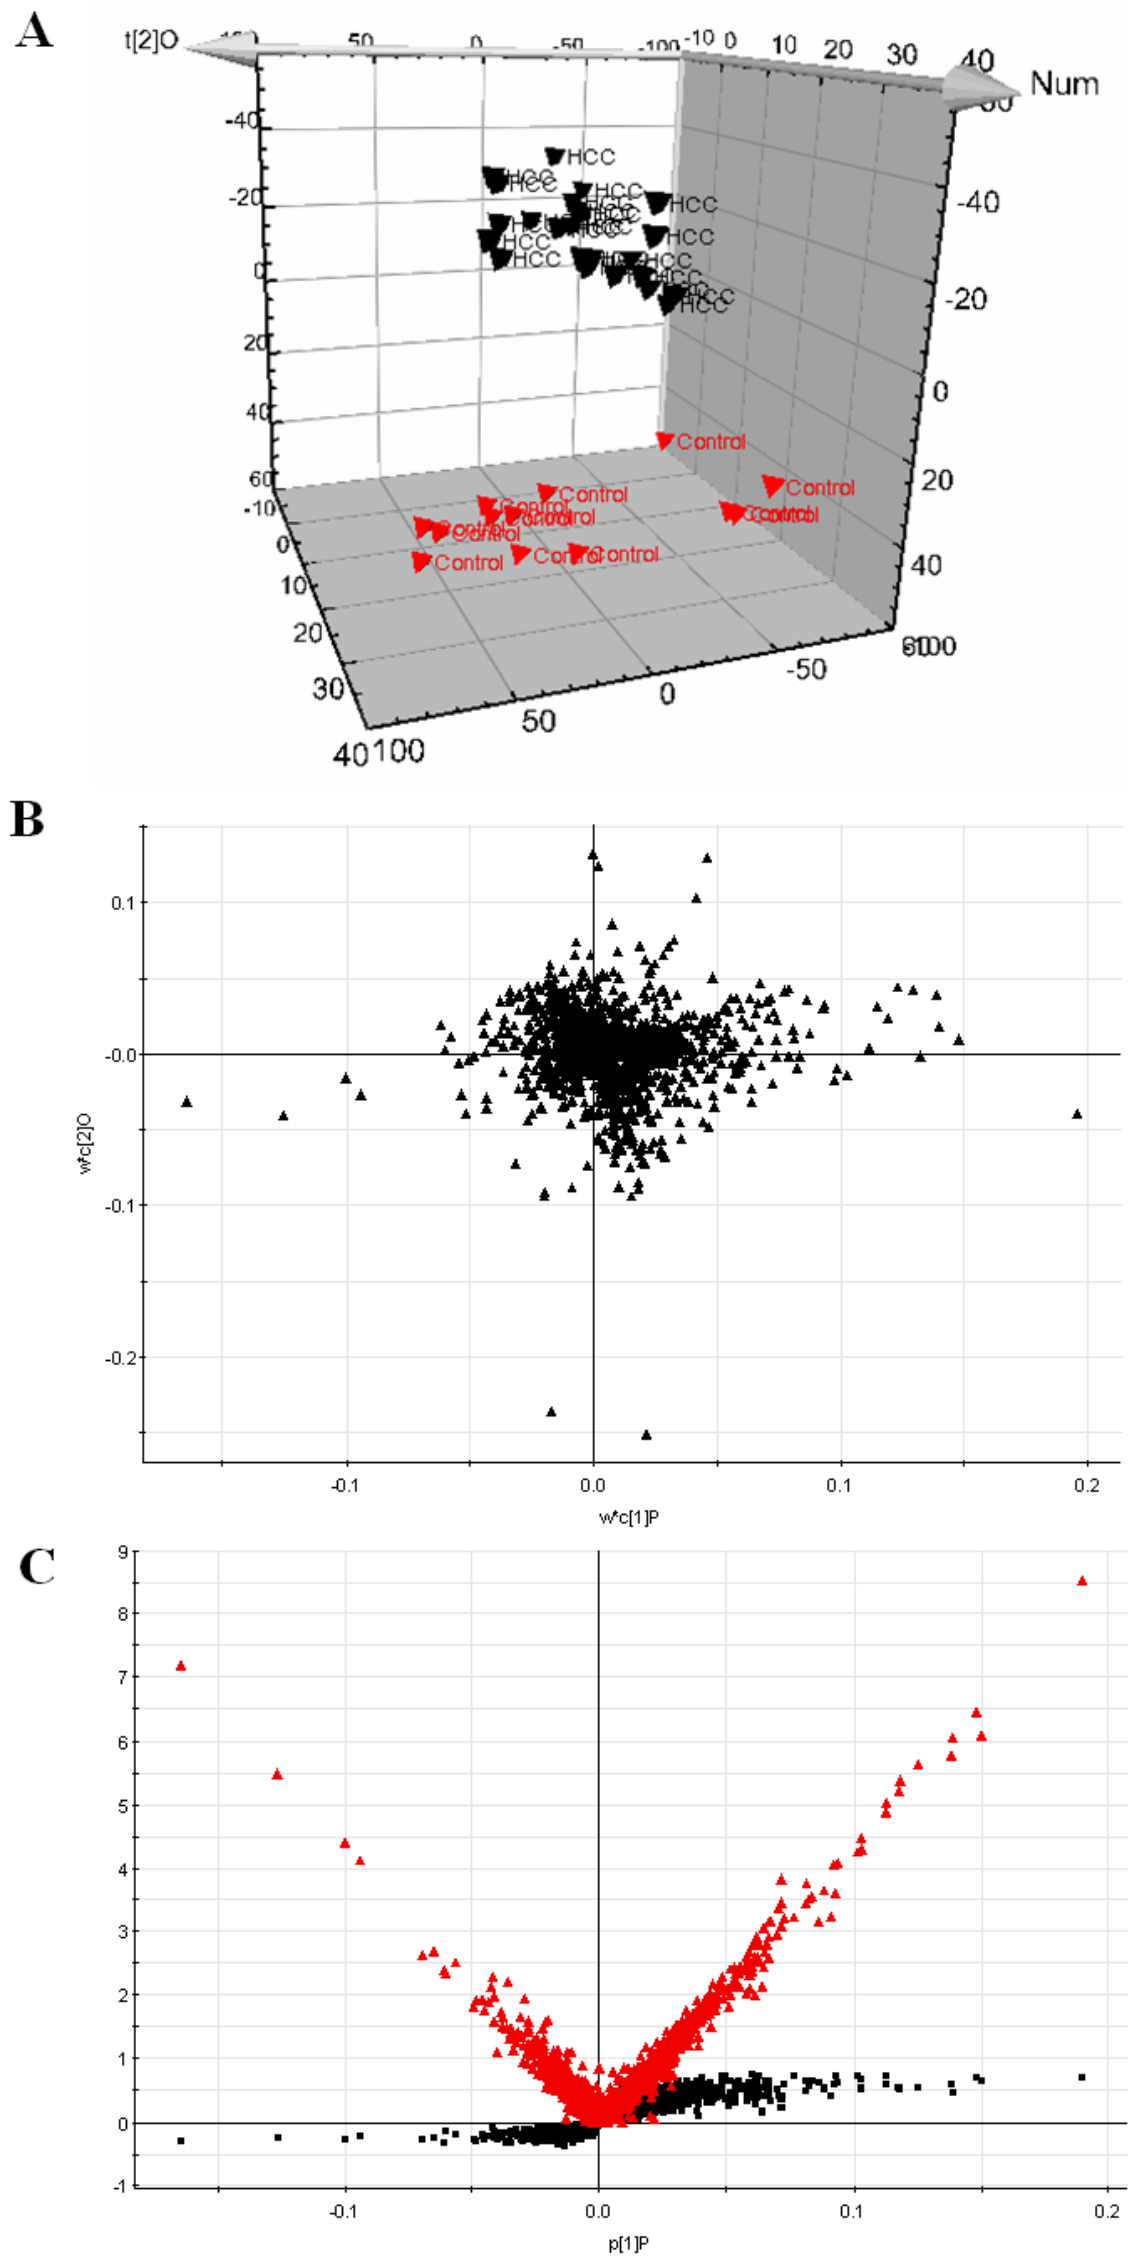

**Fig. S1.** Metabolomic profiling of HCC in positive mode. 3-D of PCA model for HCC group (A). Loading plot of OPLS-DA of HCC in positive mode (B). Panel C shows the combination of S- and VIP-score plots constructed from the supervised OPLS analysis of urine (ESI mode) mode (C).
